# Supplementary material
Source: PubMed Central journal article supplement (PMC4958578)
Supplement: NIHMS796251-supplement.pdf [file NIHMS796251-supplement.pdf]

## Supplementary Information for:

### Subrandom Methods for Multidimensional Nonuniform Sampling

Bradley Worley\*

*Department of Chemistry, University of Nebraska-Lincoln, Lincoln, NE 68588-0304*

#### TABLE OF CONTENTS

**Code Listing S-1.** Knuth's algorithm for drawing Poisson random deviates.

**Figure S-1.** Point spread functions of one-dimensional rejection sampling schedules.

**Figure S-2.** Point spread functions of one-dimensional Poisson-gap sampling schedules.

**Figure S-3.** Performance summaries of two-dimensional rejection-based sampling methods.

**Figure S-4.** Performance summaries of three-dimensional rejection-based sampling methods.

**Figure S-5.** Performance summaries of one-dimensional Poisson-gap sampling methods.

**Figure S-6.** Performance summaries of two-dimensional Poisson-gap sampling methods.

**Figure S-7.** Performance summaries of three-dimensional Poisson-gap sampling methods.

**Figure S-8.** Reconstruction  $\ell_2$  errors from one-dimensional Poisson-gap sampling schedules.

**Figure S-9.** Reconstruction  $\ell_2$  errors from two-dimensional Poisson-gap sampling schedules.

**Figure S-10.** Example of striped patterns observed from 2D Poisson-gap schedules.

**Figure S-11.** Example of striped patterns observed from 3D Poisson-gap schedules.

**Code Listing S-1.** Knuth's algorithm for drawing Poisson random deviates.

1.  $L \leftarrow e^{-\lambda}$
2.  $k \leftarrow 0$
3.  $p \leftarrow 1$
4. Repeat:
  - a.  $k \leftarrow k + 1$
  - b.  $u \sim U(0, 1)$
  - c.  $p \leftarrow p \cdot u$
5. Until  $p \leq L$ .
6. Return  $k - 1$  as new Poisson random deviate.

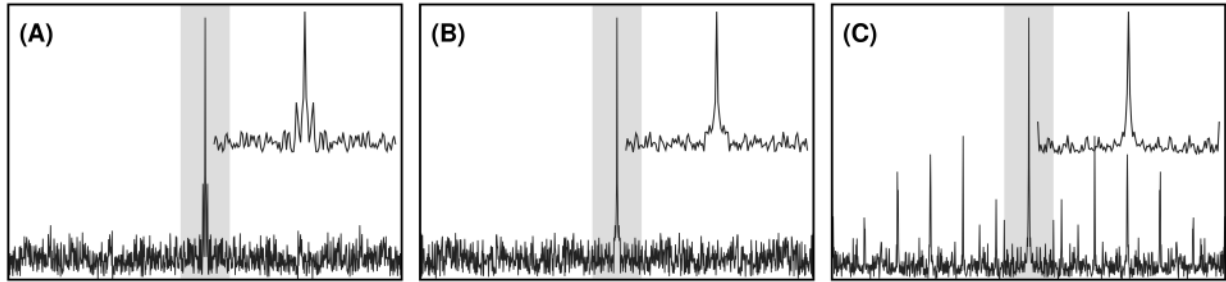

**Figure S-1.** Comparison of point-spread functions from (A) the lowest-PSR pseudorandom schedule, (B) the highest-PSR pseudorandom schedule, and (C) the subrandom schedule produced without jittering from an exponentially weighted 1024-point Nyquist grid at 10% sampling density. Inset plots indicate the shaded central regions of each point-spread function in order to highlight artifacts near the fundamental. The high coherence of subrandom sampling is readily apparent from panel (C).

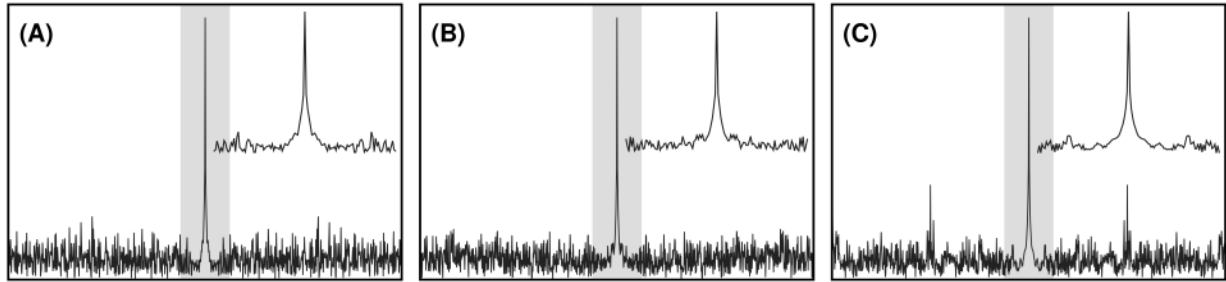

**Figure S-2.** Comparison of point-spread functions from (A) the lowest-PSR pseudorandom Poisson-gap schedule, (B) the highest-PSR pseudorandom Poisson-gap schedule, and (C) the subrandom Poisson-gap schedule produced from a 1024-point Nyquist grid at 10% sampling density. Inset plots indicate the shaded central regions of each point-spread function in order to highlight artifacts near the fundamental.

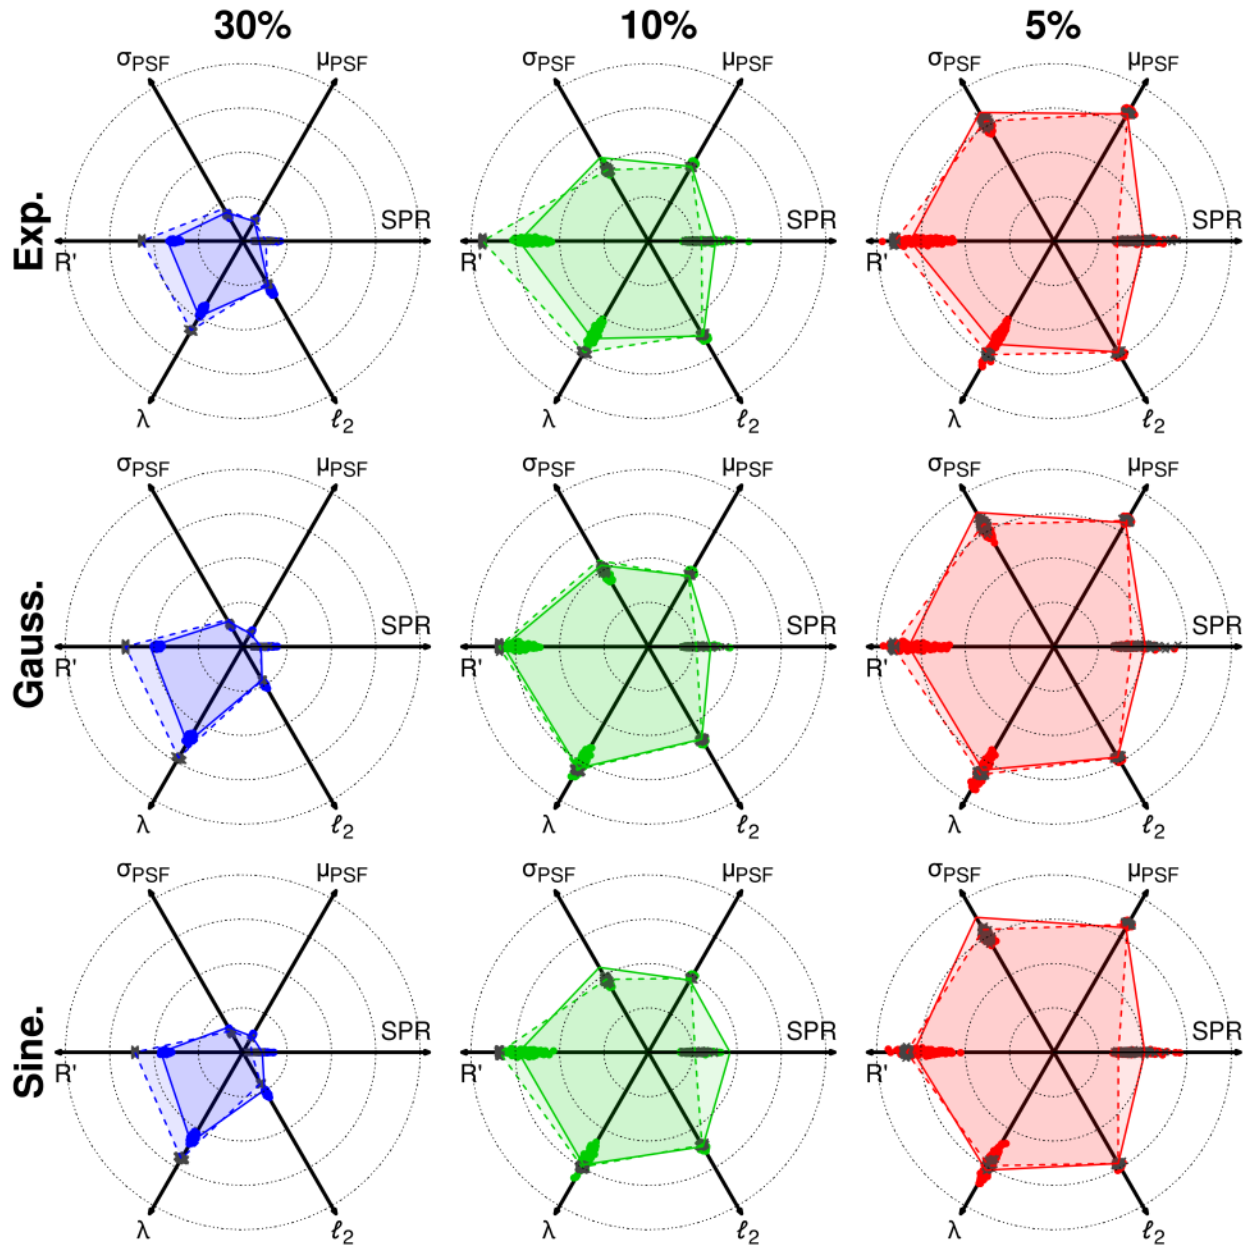

**Figure S-3.** Radar charts indicating performance metrics for two-dimensional sampling schedules on 64x64-point grids. Metrics from pseudorandom, jittered pseudorandom, subrandom and jittered subrandom schedules are indicated by points, crosses, solid lines and dashed lines, respectively. Displayed ranges for each metric are as follows:  $SPR$ : 0.03 – 0.33,  $\mu_{PSF}$ : 0.01 – 0.07,  $\sigma_{PSF}$ : 0.003 – 0.03,  $R'$ : 1.4 – 3.2,  $\lambda$ : 0.3 – 1.2,  $\ell_2$ : 0.1 – 0.6. Lower values of each range are placed centrally on the charts, and higher values are placed towards the outer radius.

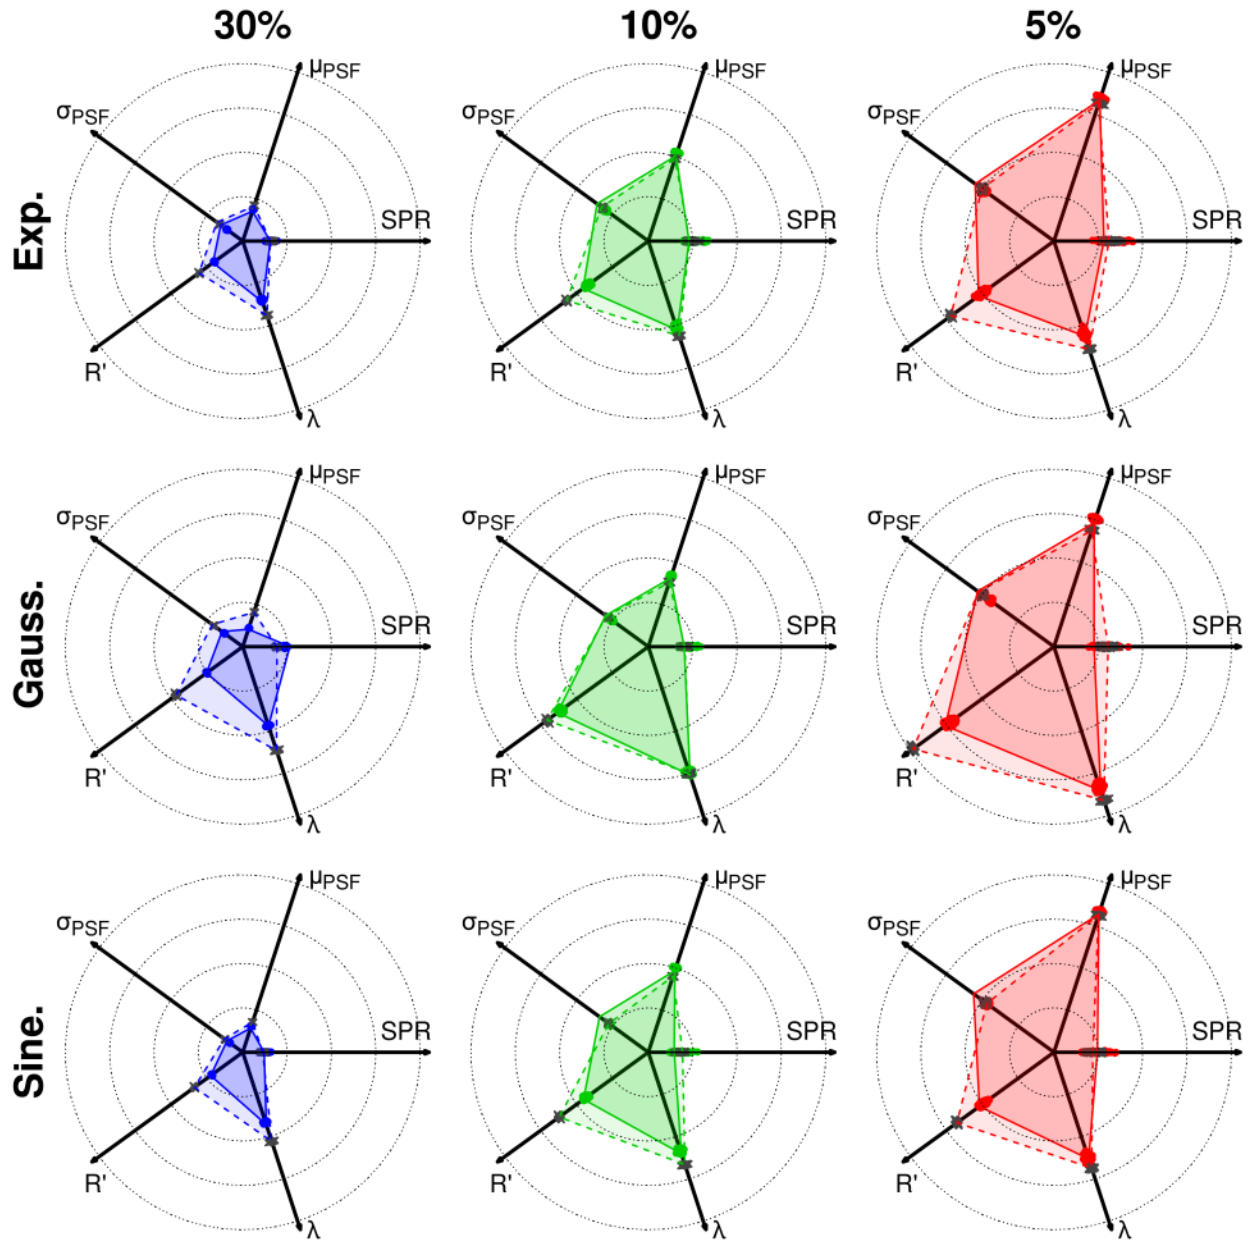

**Figure S-4.** Radar charts indicating performance metrics for three-dimensional sampling schedules on 32x32x32-point grids. Metrics from pseudorandom, jittered pseudorandom, subrandom and jittered subrandom schedules are indicated by points, crosses, solid lines and dashed lines, respectively. Displayed ranges for each metric are as follows:  $SPR$ : 0.02 – 0.25,  $\mu_{PSF}$ : 0.002 – 0.025,  $\sigma_{PSF}$ : 0.001 – 0.012,  $R'$ : 1.4 – 6.8,  $\lambda$ : 0.3 – 1.3. Lower values of each range are placed centrally on the charts, and higher values are placed towards the outer radius.

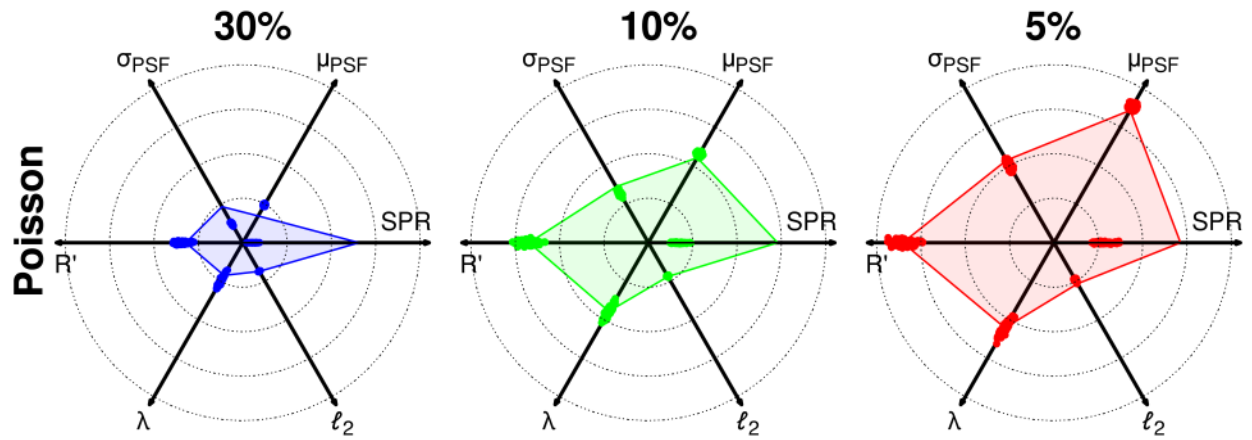

**Figure S-5.** Radar charts indicating performance metrics for one-dimensional Poisson-gap sampling schedules on 1024-point grids. Metrics from pseudorandom and subrandom schedules are indicated by points and solid lines, respectively. Displayed ranges for each metric are as follows:  $SPR$ : 0.08 – 1,  $\mu_{PSF}$ : 0.01 – 0.13,  $\sigma_{PSF}$ : 0.01 – 0.11,  $R'$ : 1.1 – 2.2,  $\lambda$ : 0.3 – 1.6,  $\ell_2$ : 0 – 1. Lower values of each range are placed centrally on the charts, and higher values are placed towards the outer radius.

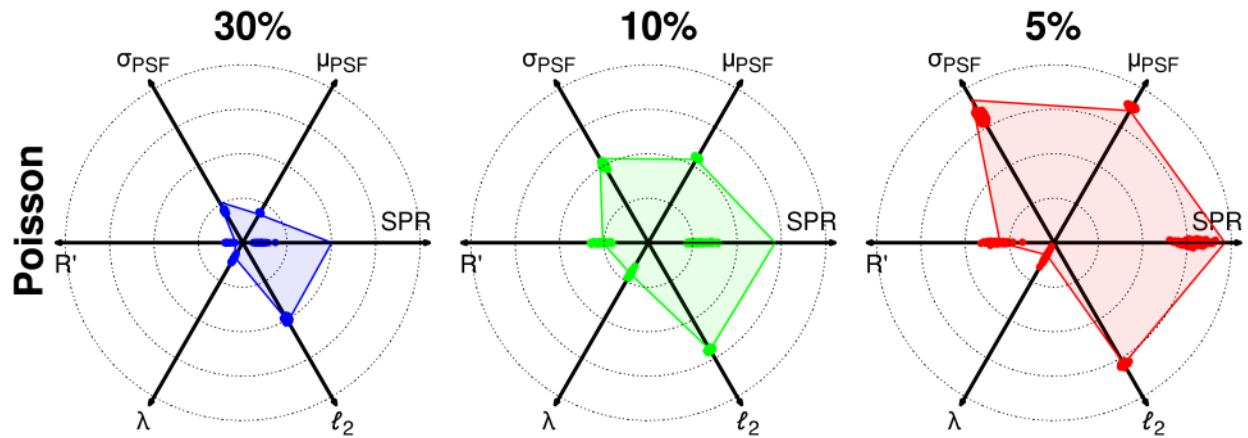

**Figure S-6.** Radar charts indicating performance metrics for two-dimensional Poisson-gap sampling schedules on 64x64-point grids. Metrics from pseudorandom and subrandom schedules are indicated by points and solid lines, respectively. Displayed ranges for each metric are as follows:  $SPR$ : 0.03 – 0.33,  $\mu_{PSF}$ : 0.01 – 0.07,  $\sigma_{PSF}$ : 0.003 – 0.03,  $R'$ : 1.4 – 3.2,  $\lambda$ : 0.3 – 1.2,  $\ell_2$ : 0.1 – 0.6. Lower values of each range are placed centrally on the charts, and higher values are placed towards the outer radius.



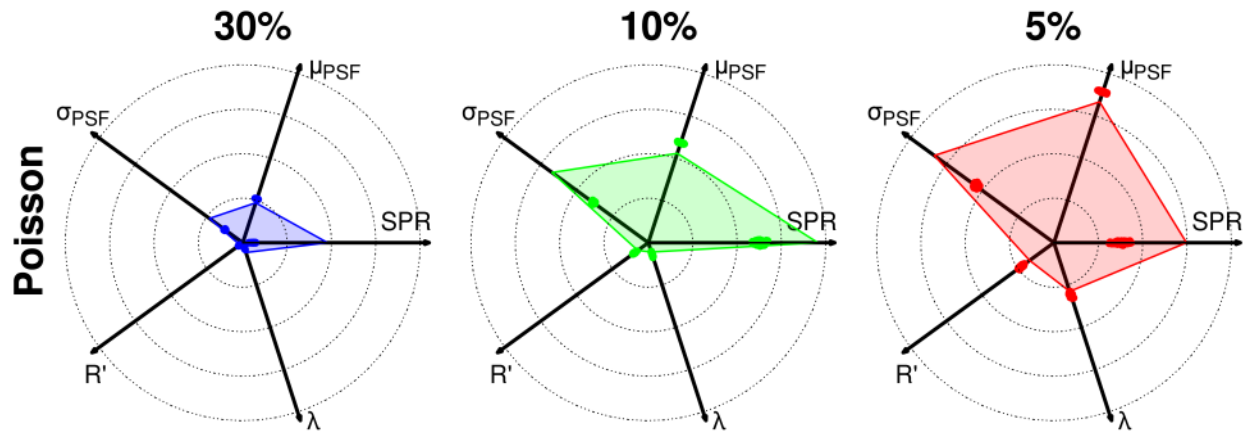

**Figure S-7.** Radar charts indicating performance metrics for three-dimensional Poisson-gap sampling schedules on 32x32x32-point grids. Metrics from pseudorandom and subrandom schedules are indicated by points and solid lines, respectively. Displayed ranges for each metric are as follows:  $SPR$ : 0.02 – 0.25,  $\mu_{PSF}$ : 0.002 – 0.025,  $\sigma_{PSF}$ : 0.001 – 0.012,  $R'$ : 1.4 – 6.8,  $\lambda$ : 0.3 – 1.3. Lower values of each range are placed centrally on the charts, and higher values are placed towards the outer radius.

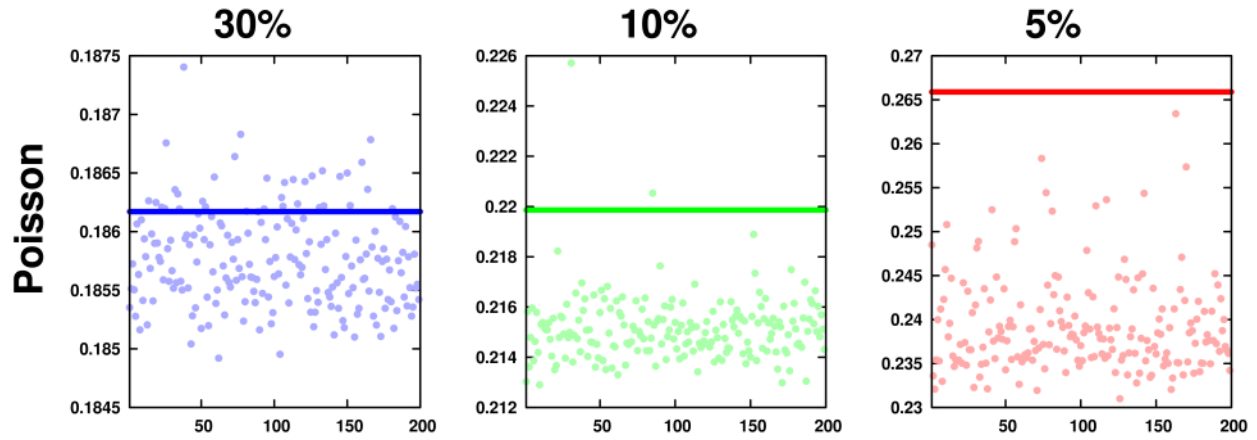

**Figure S-8.** Expanded view of  $\ell_2$  reconstruction errors from one-dimensional Poisson-gap sampling methods. Errors from pseudorandom and subrandom schedules are indicated by circles and lines, respectively. In all cases, subrandom sampling performs poorly in comparison to pseudorandom sampling. It should also be noted that one-dimensional Poisson-gap schedules maintain relatively low reconstruction errors, irrespective of sampling density.

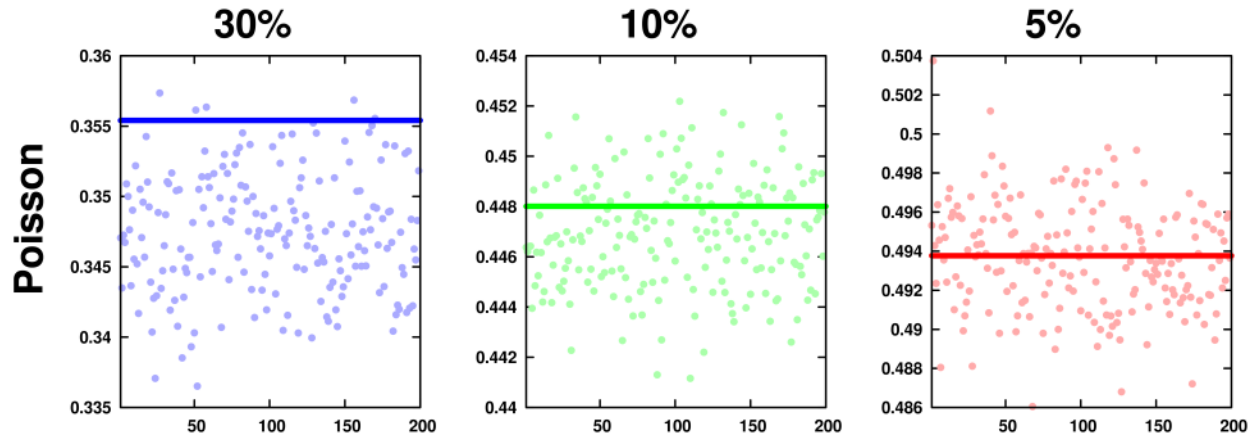

**Figure S-9.** Expanded view of  $\ell_2$  reconstruction errors from two-dimensional Poisson-gap sampling methods. Errors from pseudorandom and subrandom schedules are indicated by circles and lines, respectively.

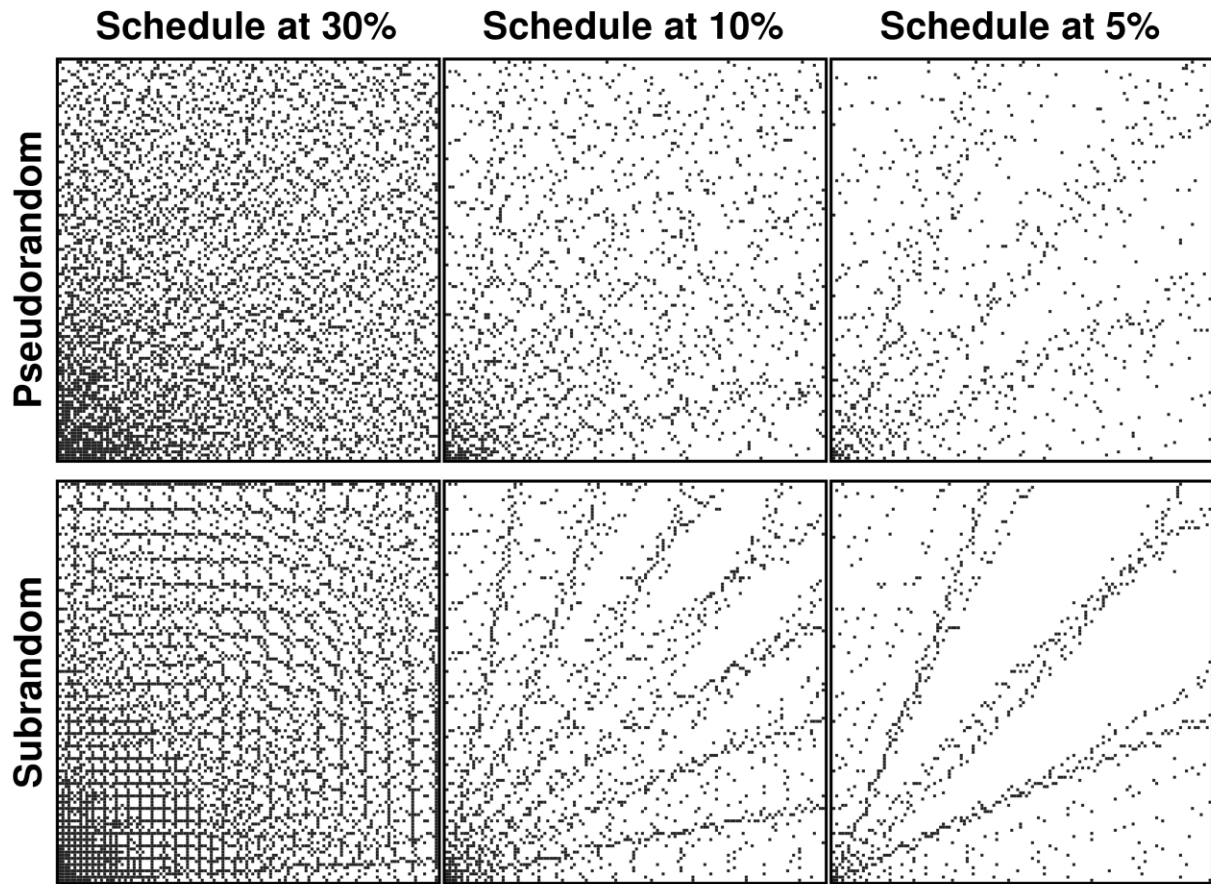

**Figure S-10.** Illustration of two-dimensional “striped” patterns arising from both pseudorandom and subrandom Poisson-gap sampling methods as global sampling density is decreased.

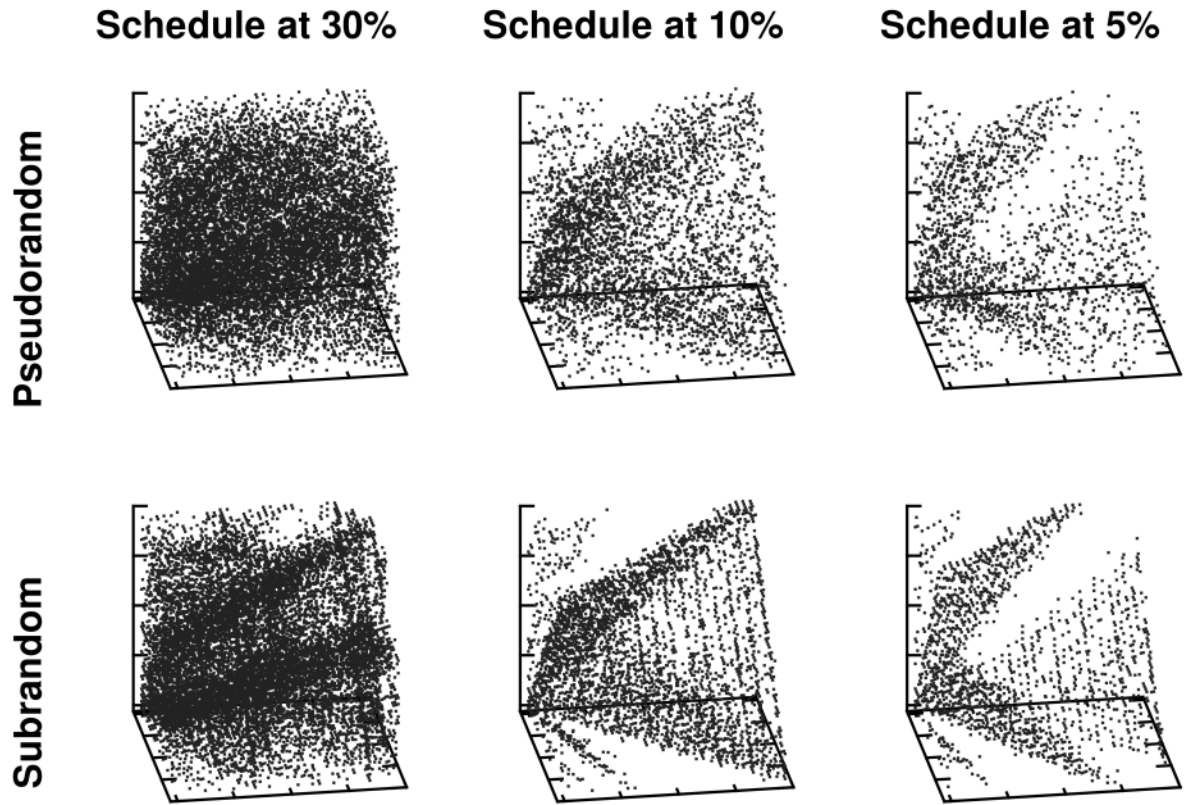

**Figure S-11.** Illustration in three dimensions of “striped” pattern produced by Poisson-gap sampling using both pseudorandom and subrandom sampling methods.
